# Supplementary material for: Hydrogen-bonded pillars of alternating chiral complex cations and anions: 1. Synthesis, characterization, X-ray structure and thermal stability of catena-{[Co(H2oxado)3][Cr(C2O4)3]·5H2O} and of its precursor (H3oxado)[Co(H2oxado)3](SO4)2·2H2O
Source: Royal Society of Chemistry journal article supplement (doi:10.1039/b818793b), 2009-01-01
Supplement: b818793b.pdf [file b818793b.pdf]

## Supplementary Material

### Hydrogen-bonded pillars of alternating chiral complex cations and anions: 1. Synthesis, characterization, X-ray structure and thermal stability of *catena*- {[Co(H<sub>2</sub>oxado)<sub>3</sub>][Cr(C<sub>2</sub>O<sub>4</sub>)<sub>3</sub>]·5H<sub>2</sub>O} and of its precursor (H<sub>3</sub>oxado)- [Co(H<sub>2</sub>oxado)<sub>3</sub>](SO<sub>4</sub>)<sub>2</sub>·2H<sub>2</sub>O

Michel M. Bélombé <sup>a,\*</sup>, Justin Nenwa <sup>a</sup>, Yves A. Mbiangué <sup>a</sup>, Félicité Majoumo-Mbé <sup>b</sup>,  
Peter Lönnecke <sup>c</sup> and Evamarie Hey-Hawkins <sup>c,\*</sup>

<sup>a</sup> Department of Inorganic Chemistry, Faculty of Science, P.O. Box 812, University of Yaounde I, Yaounde, Cameroon

<sup>b</sup> Department of Chemistry, Faculty of Science, University of Buea, P.O. Box 63, Buea, Cameroon

<sup>c</sup> Fakultät für Chemie und Mineralogie, Institut für Anorganische Chemie, Johannisallee 29, D-04103 Leipzig, Germany

Table S1. Hydrogen bonds for **2** [pm and °].

| D-H...A              | d(D-H) | d(H...A) | d(D...A) | <(DHA) |
|----------------------|--------|----------|----------|--------|
| O(1)-H(1O)...O(15)   | 87(3)  | 182(3)   | 268.8(4) | 172(5) |
| O(2)-H(2O)...O(8)#1  | 85(3)  | 184(3)   | 265.6(4) | 160(5) |
| O(3)-H(3O)...O(11)   | 86(3)  | 182(3)   | 264.8(4) | 161(5) |
| O(4)-H(4O)...O(16)#1 | 87(3)  | 176(3)   | 262.6(4) | 175(6) |
| O(5)-H(5O)...O(7)    | 87(3)  | 183(3)   | 265.1(4) | 157(5) |
| O(6)-H(6O)...O(12)#1 | 87(3)  | 187(3)   | 270.5(4) | 161(5) |
| N(3)-H(1N)...O(22)   | 78(2)  | 220(2)   | 296.8(7) | 169(4) |
| N(4)-H(4N)...O(2)    | 82(2)  | 213(5)   | 259.7(5) | 116(4) |
| N(4)-H(3N)...O(10)#2 | 80(2)  | 224(3)   | 299.3(5) | 157(5) |
| N(7)-H(6N)...O(17)#3 | 80(2)  | 227(3)   | 299.1(5) | 151(4) |
| N(8)-H(7N)...O(17)#3 | 85(2)  | 222(2)   | 306.3(5) | 175(5) |

|                        |       |        |           |        |
|------------------------|-------|--------|-----------|--------|
| N(8)-H(8N)...O(19)#4   | 85(2) | 225(3) | 305.5(6)  | 159(4) |
| N(11)-H(10N)...O(13)#4 | 84(2) | 240(5) | 276.2(5)  | 107(4) |
| N(12)-H(12N)...O(23)   | 83(2) | 220(4) | 294.8(12) | 149(5) |
| N(12)-H(11N)...O(9)#5  | 83(2) | 222(2) | 305.3(5)  | 174(5) |

---

Symmetry transformations used to generate equivalent atoms:

#1  $x-1, y, z$  #2  $-x+1, -y+1, -z+1$  #3  $-x+1/2, y+1/2, -z+1/2$

#4  $x-1/2, -y+1/2, z-1/2$  #5  $-x+1/2, y-1/2, -z+1/2$
